# Supplementary material
Source: PubMed Central journal article supplement (PMC1149422)

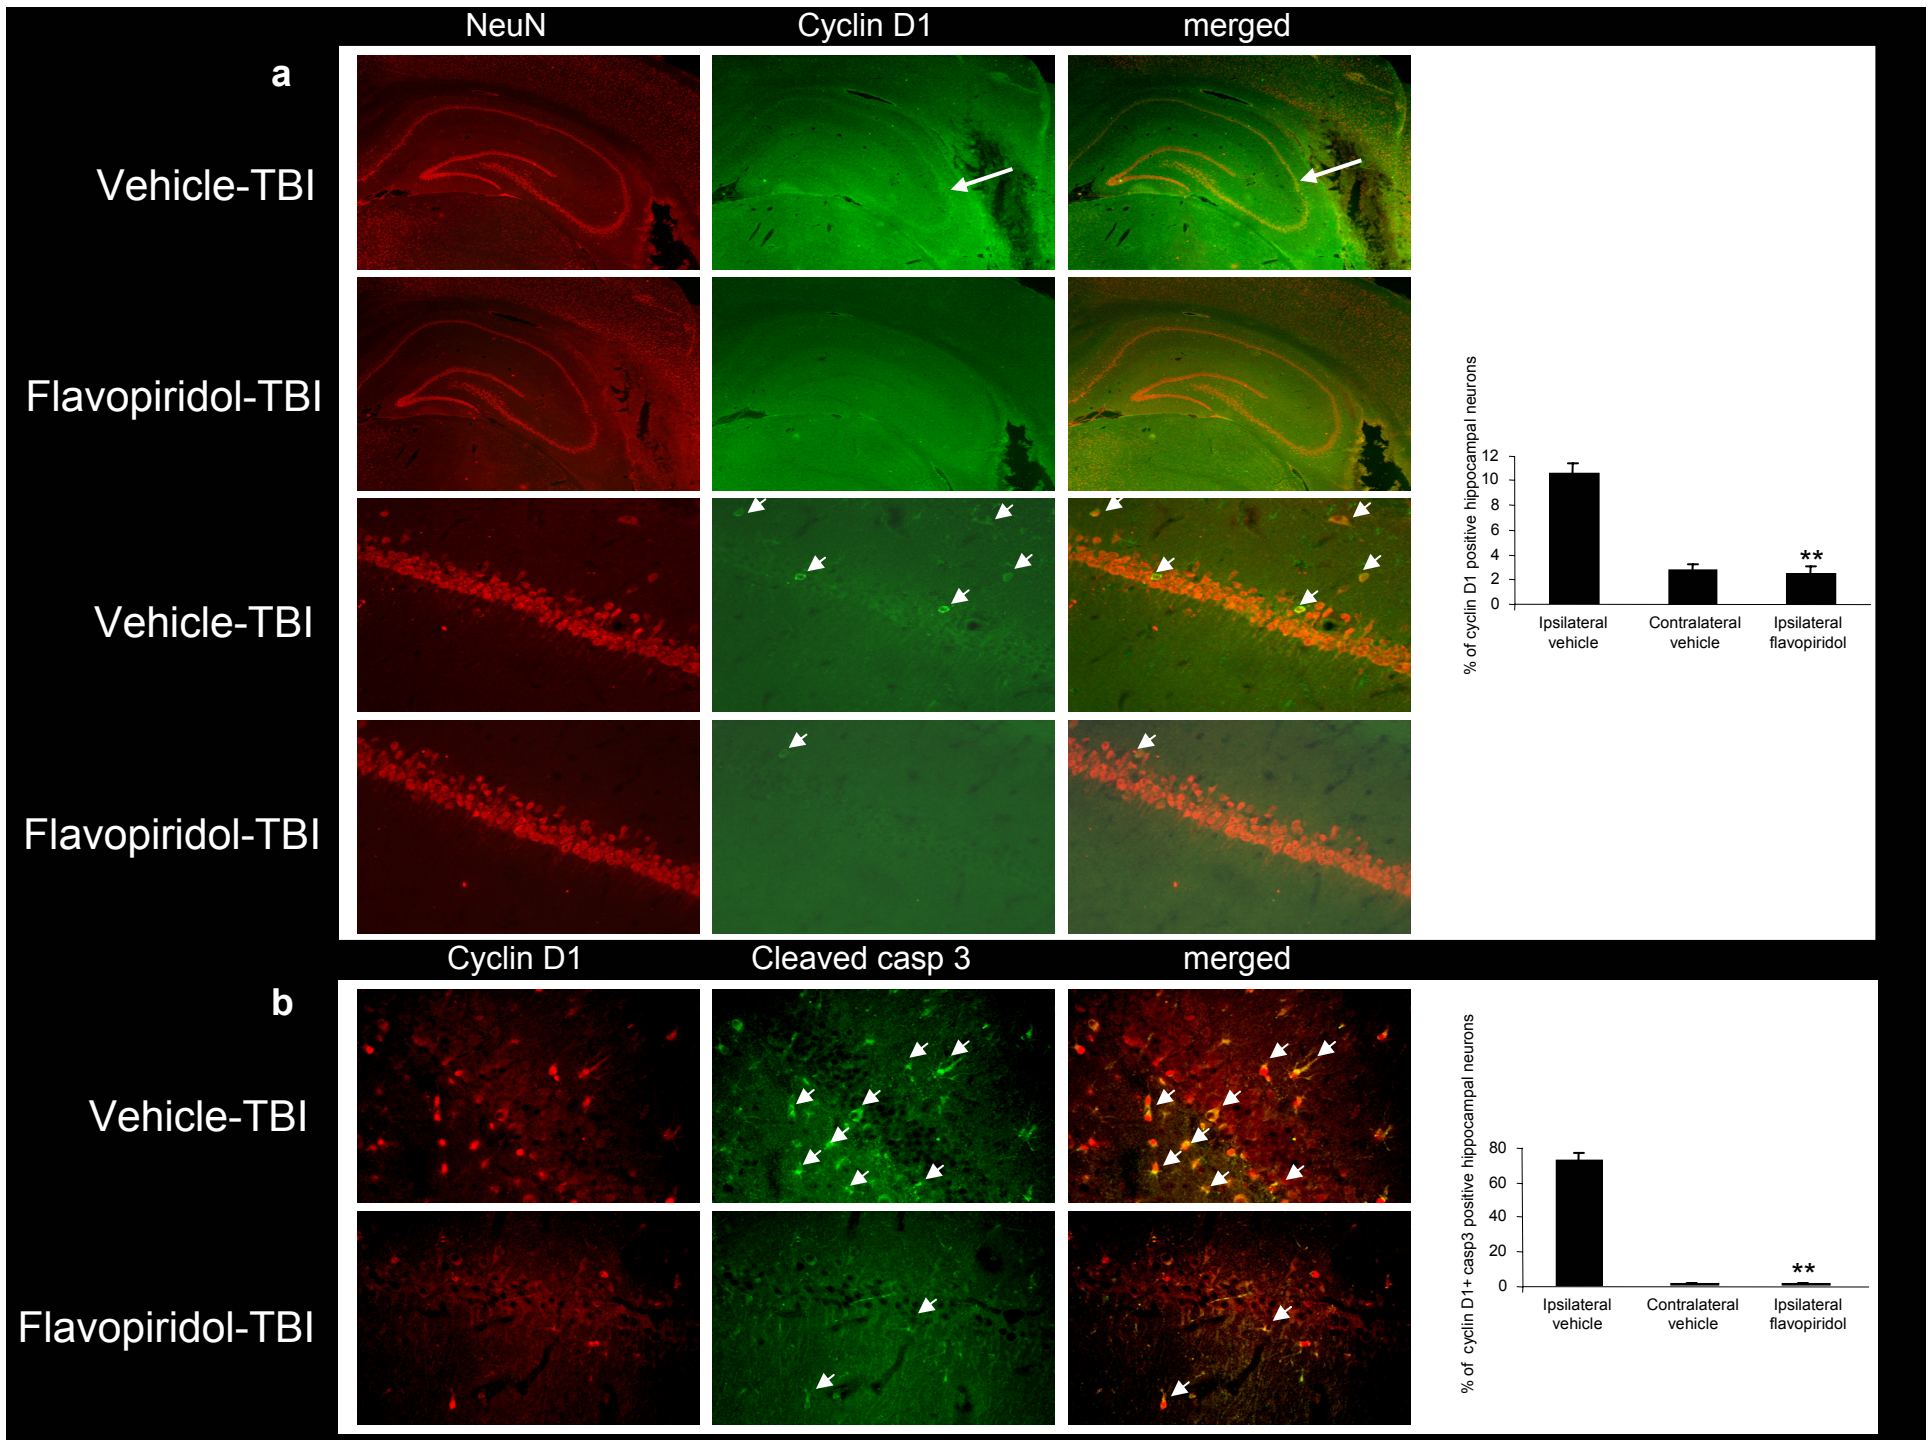

Supplement: pnas_0500989102_2.pdf [file pnas_0500989102_2.pdf]
